# Supplementary material for: Heavy-tailed flood peak distributions: What is the effect of the spatial variability of rainfall and runoff generation?
Source: Copernicus journal article supplement (doi:10.5194/hess-2024-181), 2024-07-29

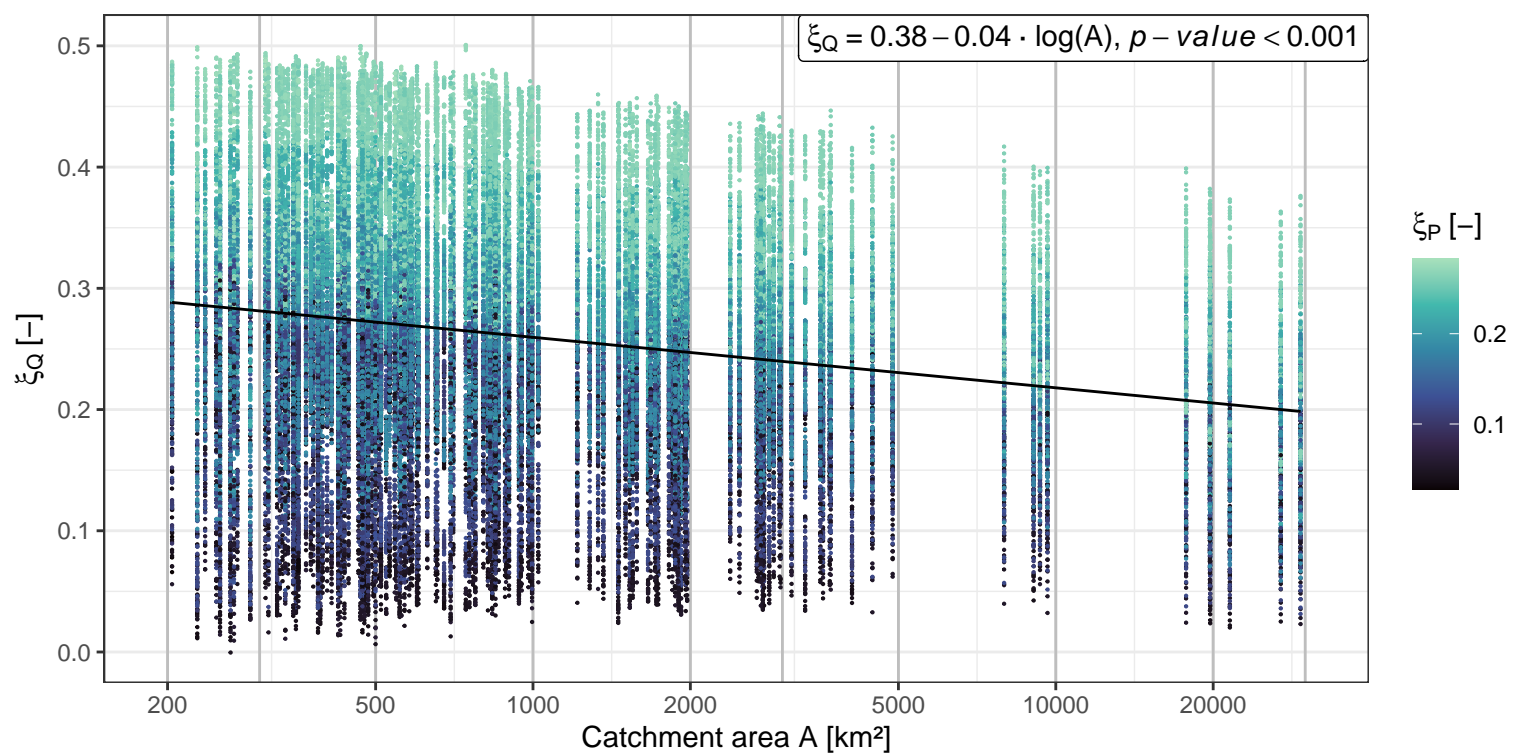

Supplement: Supplementary file [file hess-2024-181-AC1-supplement.pdf]
